# Supplementary material for: Mo doping and Se vacancy engineering for boosting electrocatalytic water oxidation by regulating the electronic structure of self-supported Co9Se8@NiSe
Source: Royal Society of Chemistry journal article supplement (doi:10.1039/d2nr05410h), 2022-11-28
Supplement: d2nr05410h1.pdf [file d2nr05410h1.pdf]

**Supporting Information for**  
**Mo doping and Se vacancy engineering for boosting electrocatalytic**  
**water oxidation by regulating the electronic structure of self-**  
**supported Co<sub>9</sub>Se<sub>8</sub>@NiSe**

Lin Tian<sup>a,b,c\*</sup>, Zhenyang Chen<sup>a</sup>, Tingjian Wang<sup>a</sup>, Ming Cao<sup>a</sup>, Xinhua Lu<sup>a</sup>, Wenjing  
Cheng<sup>b,c</sup>, Changchun He<sup>a</sup>, Ju Wang<sup>a</sup>, Zhao Li<sup>a\*</sup>

<sup>a</sup>*School of materials and Chemical Engineering, Xuzhou University of Technology,  
Xuzhou 221018, China*

<sup>b</sup>*University and College Key Lab of Natural Product Chemistry and Application in  
Xinjiang, School of Chemistry and Environmental Science, Yili Normal University,  
Yining  
835000, China*

<sup>c</sup>*Key Laboratory of Pollutant Chemistry and Environmental Treatment, School of  
Chemistry and Environmental Science, Yili Normal University, Yining 835000, China*

*Corresponding Author: Lin Tian and Zhao Li  
Email: xzittl@xzit.edu.cn (L. Tian), xzitzl@xzit.edu.cn (Z. Li)*

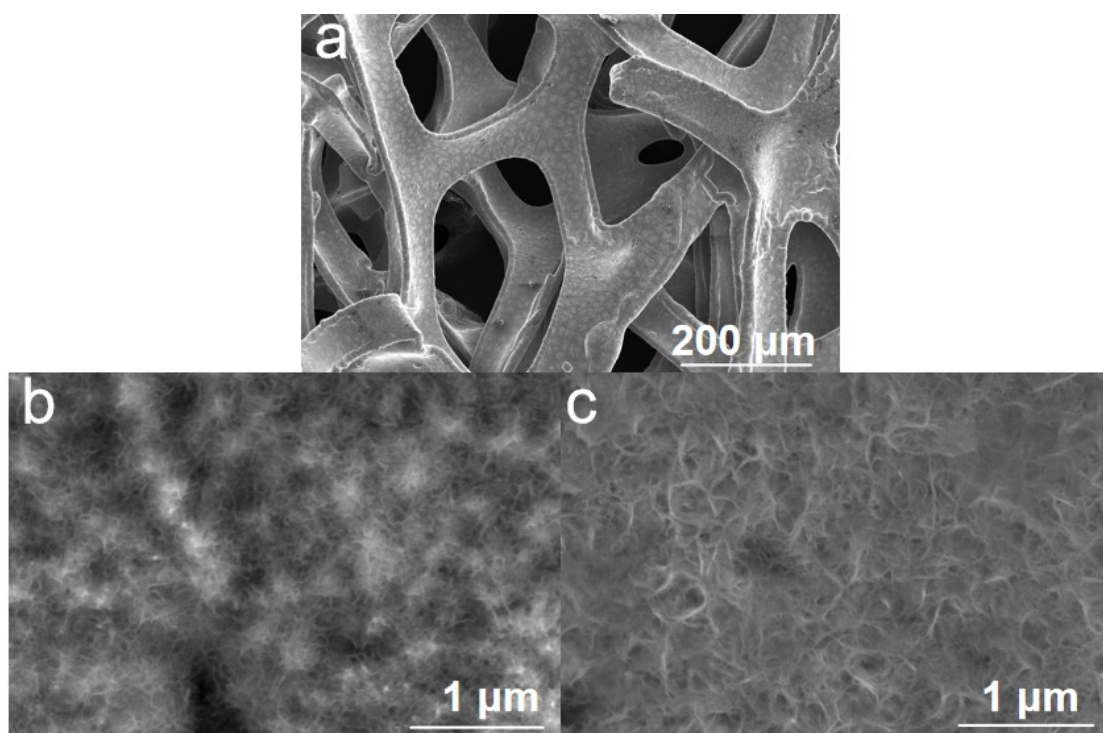

**Fig.S1** (a) SEM images of (a) pre-treated nickel foam, (b) Mo-Co<sub>9</sub>Se<sub>8</sub>@NiSe/NF-40, (c) Mo-Co<sub>9</sub>Se<sub>8</sub>@NiSe/NF-80.

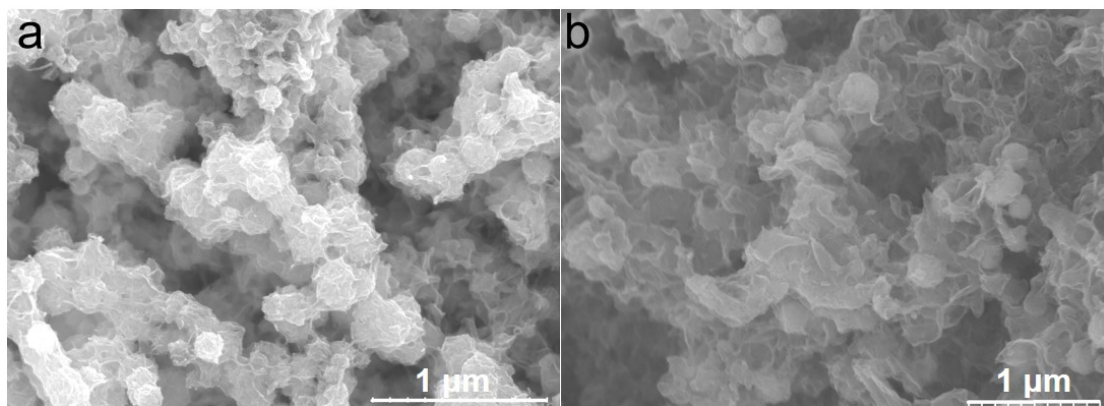

**Fig.S2** SEM images of (a) Mo-Co<sub>9</sub>Se<sub>8</sub>@NiSe/NF, (b) Co<sub>9</sub>Se<sub>8</sub>@NiSe/NF-60.

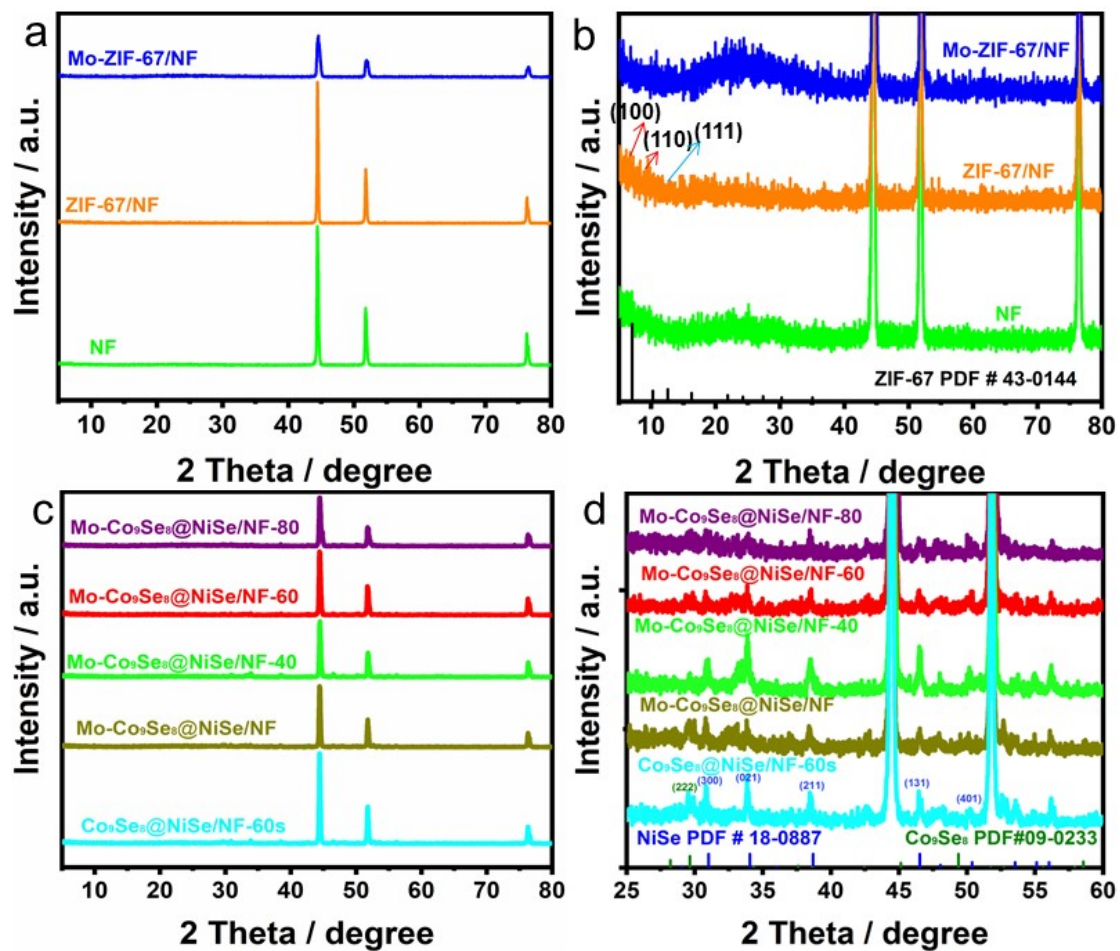

**Fig.S3** (a) XRD patterns of pre-treated NF, ZIF-67/NF, Mo-ZIF-67/NF, and (b) their corresponding locally enlarged XRD patterns. (c) XRD patterns of Mo-Co<sub>9</sub>Se<sub>8</sub>@NiSe/NF-40, Mo-Co<sub>9</sub>Se<sub>8</sub>@NiSe/NF-60, Mo-Co<sub>9</sub>Se<sub>8</sub>@NiSe/NF-80, Mo-Co<sub>9</sub>Se<sub>8</sub>@NiSe/NF, Co<sub>9</sub>Se<sub>8</sub>@NiSe/NF-40, and (d) their corresponding locally enlarged XRD patterns.

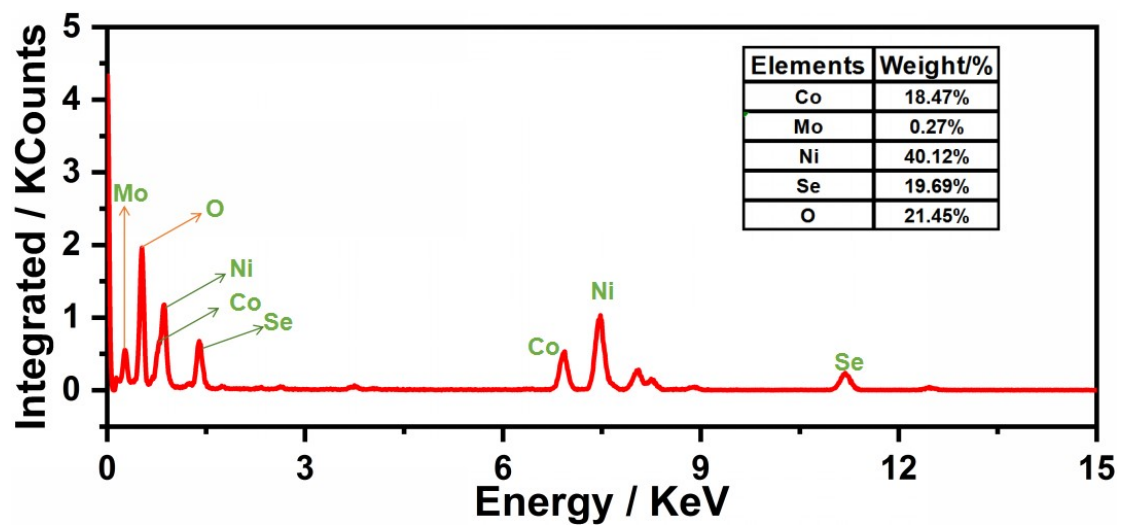

Fig.S4 EDS spectrum of Mo-Co<sub>9</sub>Se<sub>8</sub>@NiSe/NF-60.

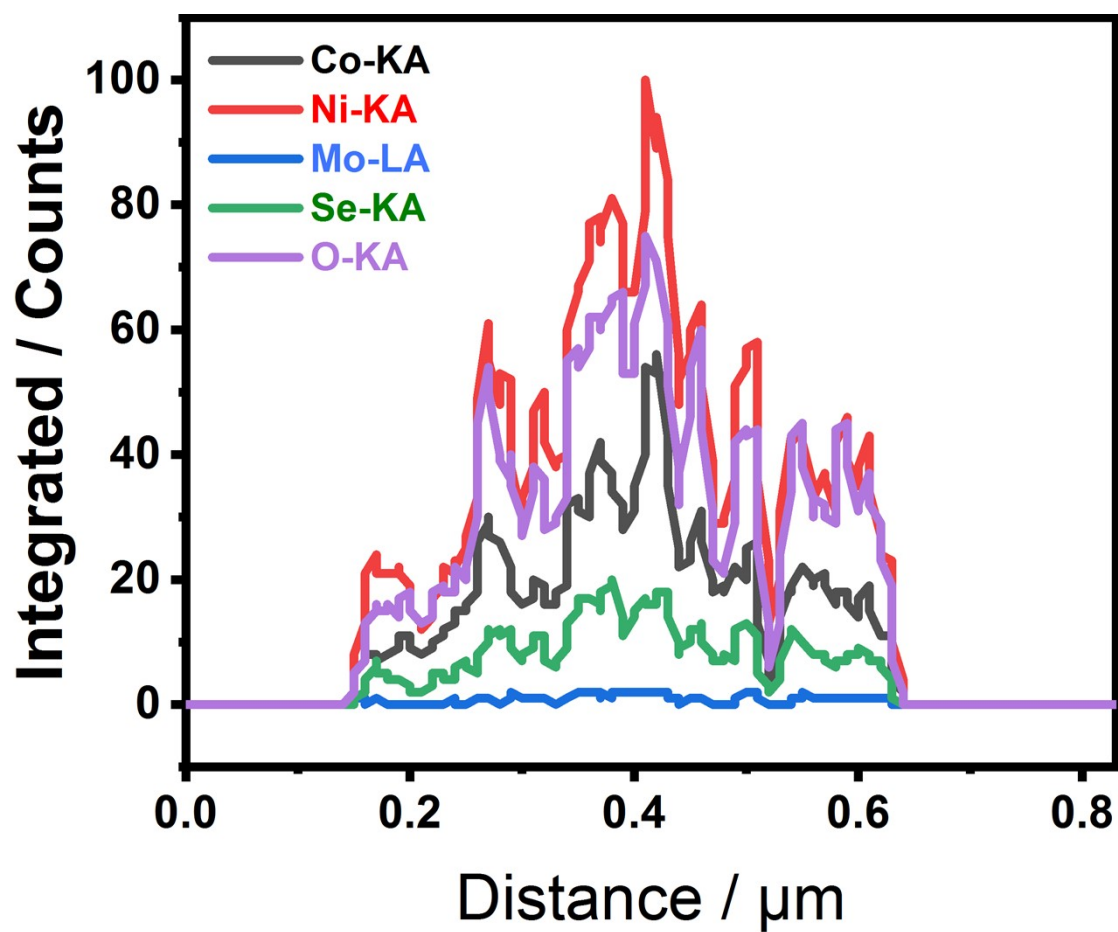

Fig.S5 Line-scan profile of Mo-Co<sub>9</sub>Se<sub>8</sub>@NiSe/NF-60.

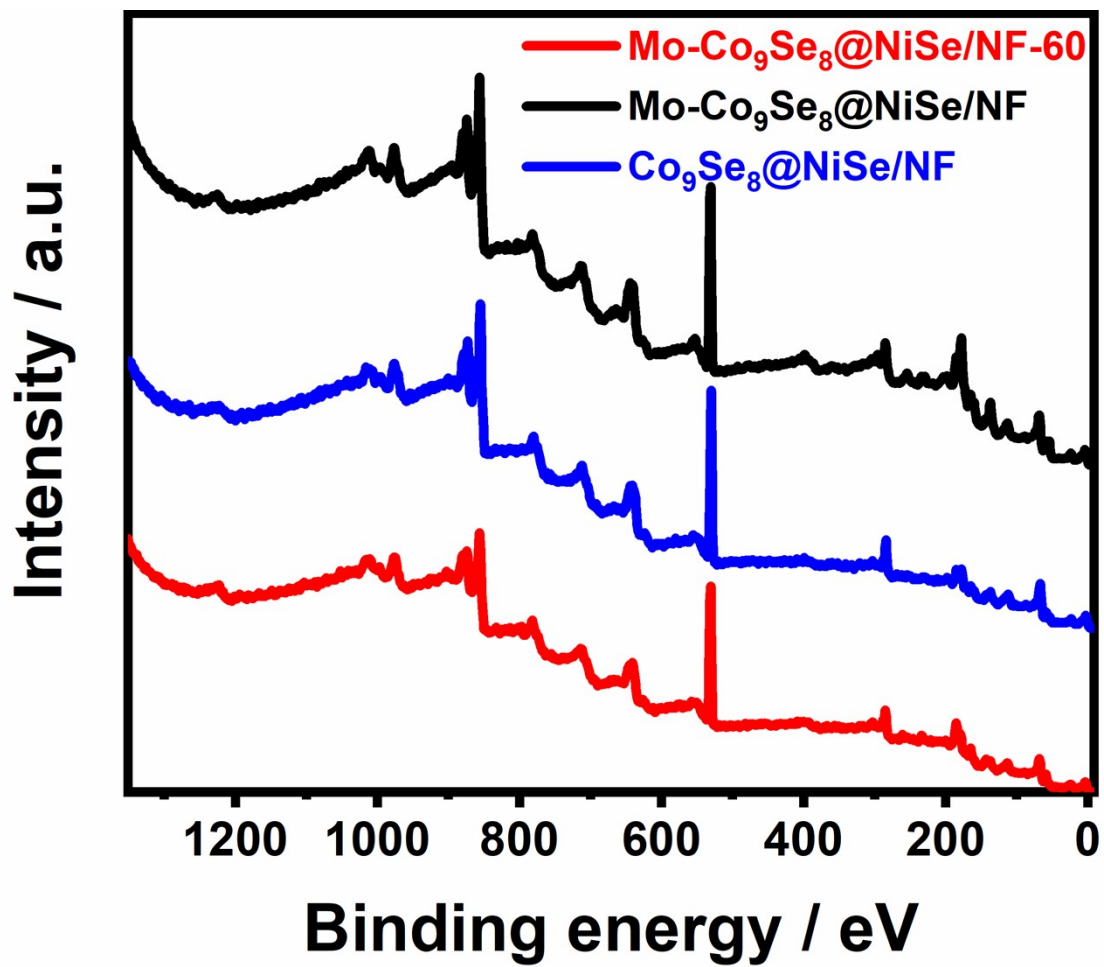

**Fig.S6** Survey spectrum of Mo-Co<sub>9</sub>Se<sub>8</sub>@NiSe/NF-60, Mo-Co<sub>9</sub>Se<sub>8</sub>@NiSe/NF, Co<sub>9</sub>Se<sub>8</sub>@NiSe/NF-60.

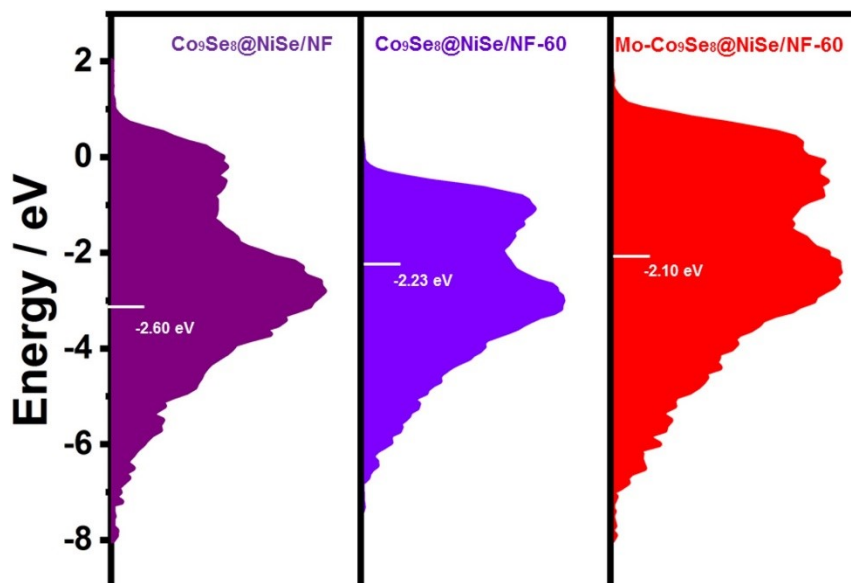

**Fig.S7** Surface valence band spectra and the calculated d-band centers of Co<sub>9</sub>Se<sub>8</sub>@NiSe/NF, Co<sub>9</sub>Se<sub>8</sub>@NiSe/NF-60, and Mo-Co<sub>9</sub>Se<sub>8</sub>@NiSe/NF-60.



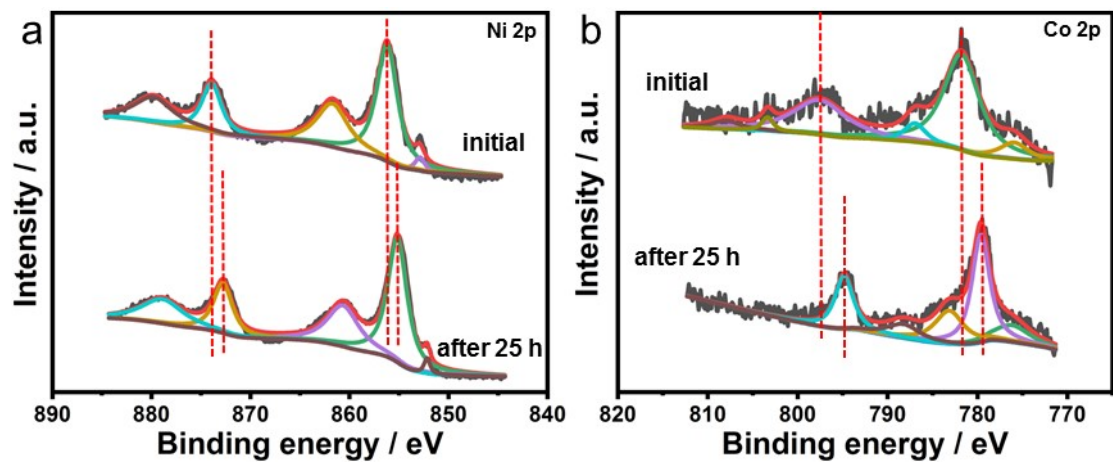

**Fig.S8** The high-resolution XPS spectra of (a) Co 2p and (b) Ni 2p before and after CP tests.

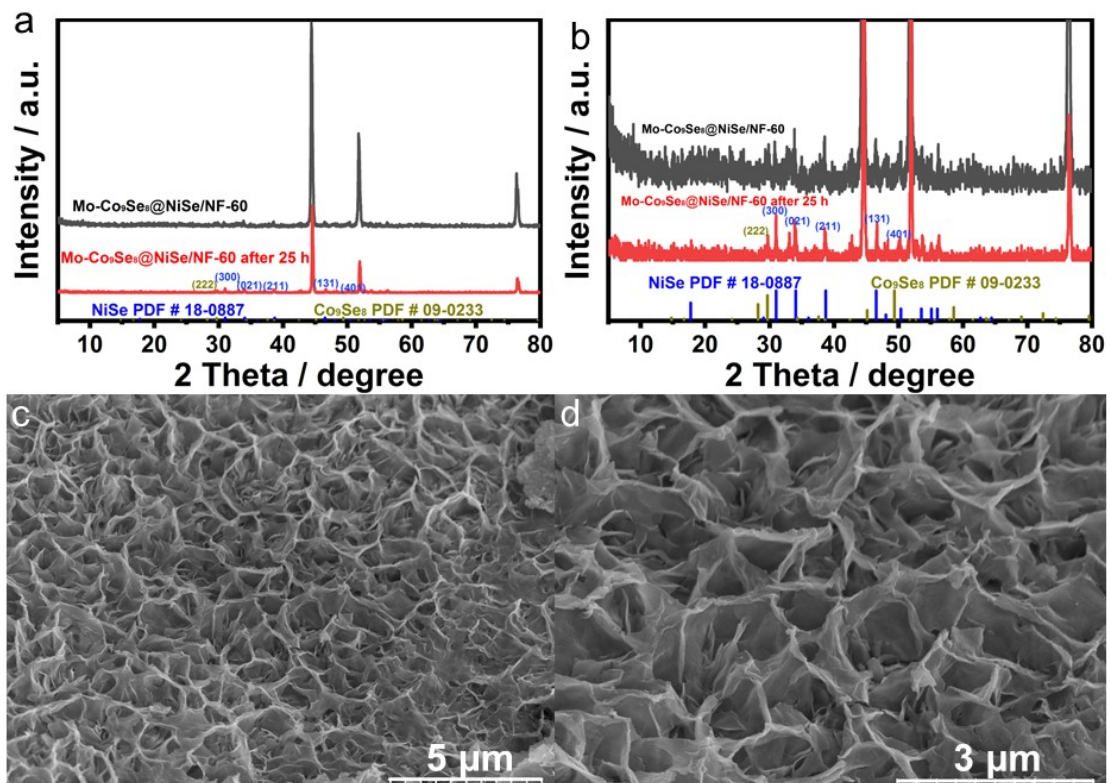

**Fig.S9** (a) XRD pattern of Mo-Co<sub>9</sub>Se<sub>8</sub>@NiSe/NF-60 before and after CP tests and (b) corresponding locally enlarged pattern. (c, d) SEM images of Mo-Co<sub>9</sub>Se<sub>8</sub>@NiSe/NF-60 with different magnification.
